# Supplementary material for: Self-reported dietary adherence, disease-specific symptoms, and quality of life are associated with healthcare provider follow-up in celiac disease
Source: Springer Nature journal article supplement (doi:10.1186/s12876-017-0713-7), 2017-12-01
Supplement: MOESM1 [file 15296062]

Supplementary Material for:

Self-reported dietary adherence, disease-specific symptoms, and quality of life are associated with healthcare provider follow-up in celiac disease

Jacob J. Hughey<sup>1\*</sup>, Bonnie K. Ray<sup>2</sup>, Anne R. Lee<sup>3</sup>, Kristin N. Voorhees<sup>4</sup>, Ciaran P. Kelly<sup>5</sup>, Detlef Schuppan<sup>5,6</sup>

<sup>1</sup>Department of Biomedical Informatics, Vanderbilt University School of Medicine, Nashville, TN.

<sup>2</sup>Talkspace, New York, NY. <sup>3</sup>Celiac Disease Center, Columbia University Medical Center, New York, NY. <sup>4</sup>Beyond Celiac, Ambler, PA. <sup>5</sup>Division of Gastroenterology, Beth Israel Deaconess Medical Center, Boston, MA. <sup>6</sup>Institute of Translational Immunology, University Medical Center, Mainz, Germany.

\* Correspondence: [jakejhughey@gmail.com](mailto:jakejhughey@gmail.com)

Figure S1

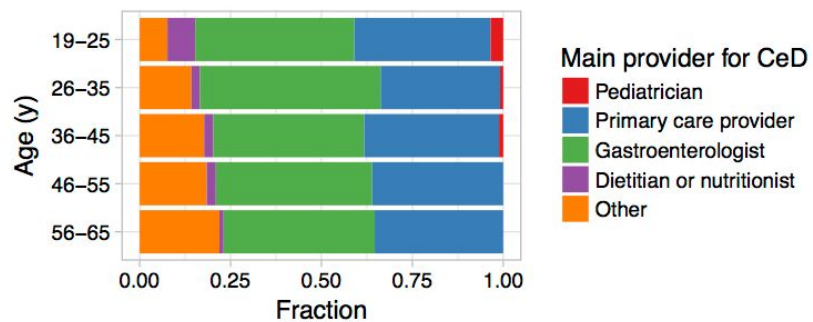

Self-reported information on who the respondent considers his/her main provider for CeD.

Figure S2

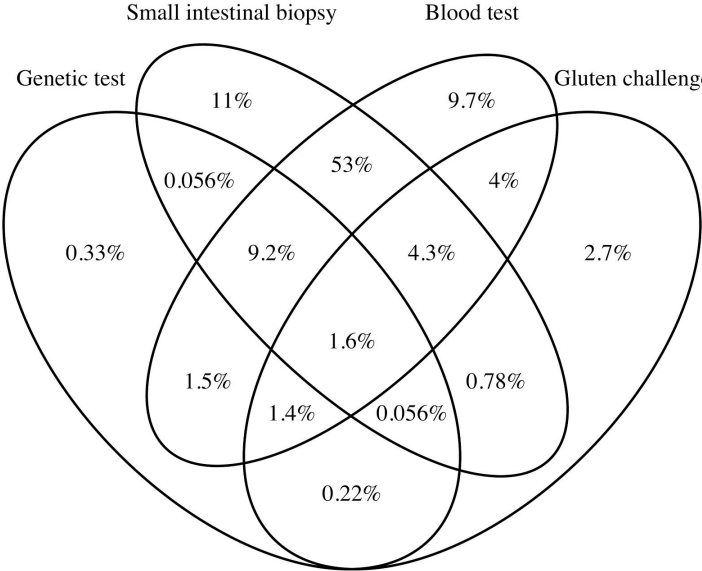

Venn diagram of self-reported diagnosis methods across all respondents.

Figure S3

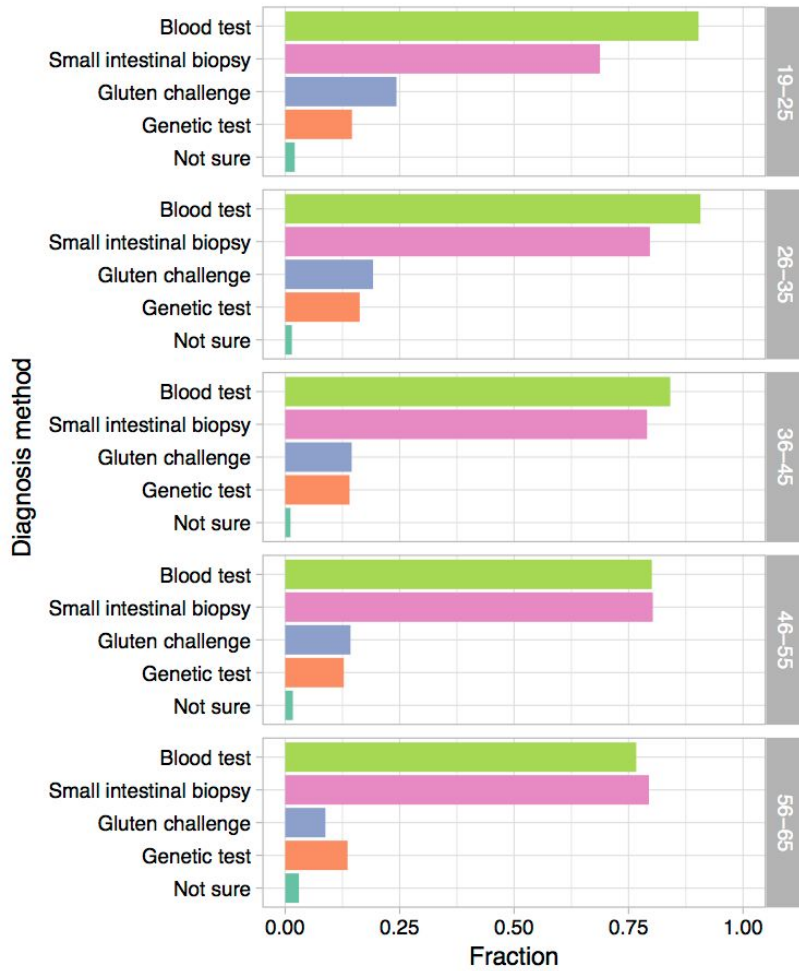

Self-reported information on methods of diagnosis for respondents in each age group. Based on a multi-group proportions test, there were significant differences between age groups in the frequency of blood test ( $P = 3.8 \times 10^{-7}$ ), small intestinal biopsy ( $P = 0.048$ ), and gluten challenge ( $P = 1.1 \times 10^{-5}$ ).

Figure S4

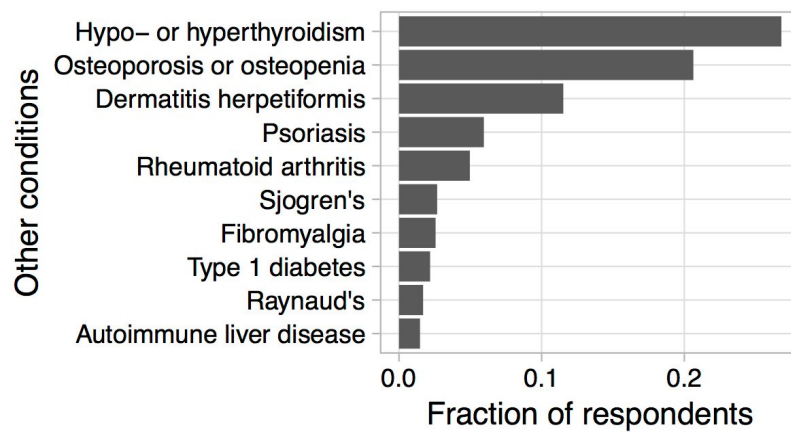

Self-reported prevalence of other autoimmune or related conditions among all respondents.

Figure S5

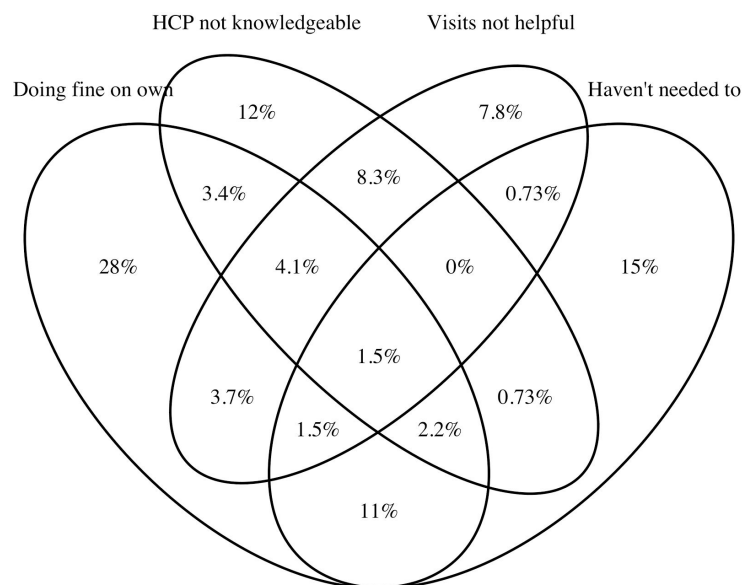

Venn diagram of self-reported reasons for not visiting an HCP about CeD. For ease of visualization, only the top 4 most commonly reported reasons are shown.

Figure S6

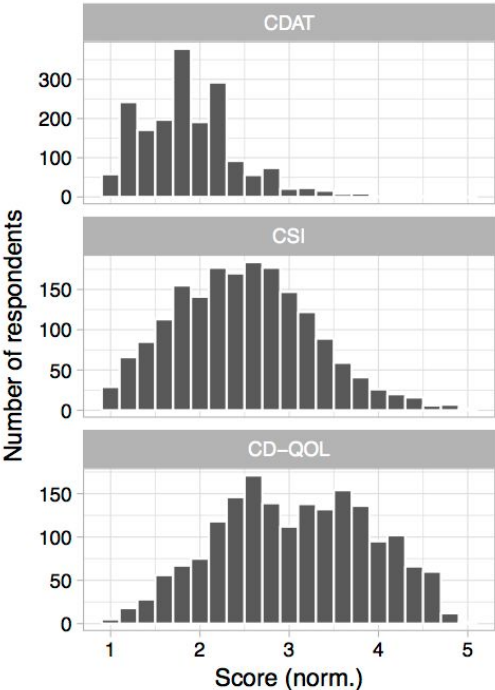

Histograms of normalized scores for each instrument. To normalize, the raw score was divided by the number of questions, so the normalized score corresponds to the average response (between 1 and 5).

Figure S7

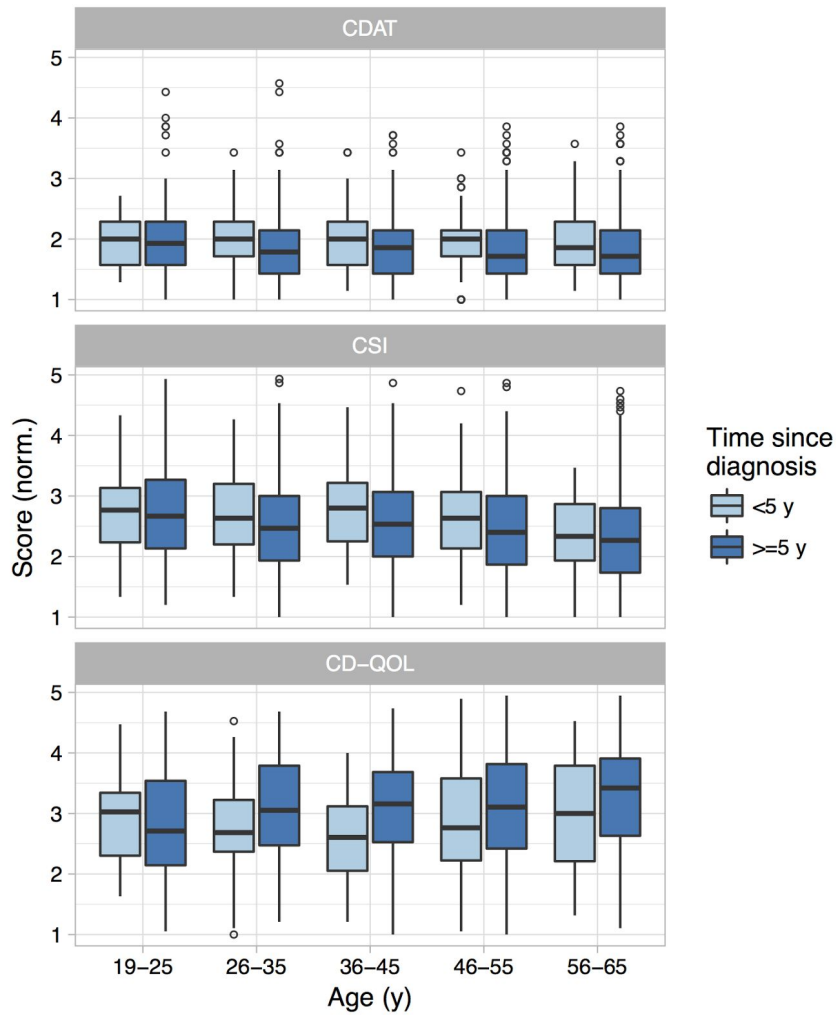

Boxplots of normalized scores for each instrument vs. age and time since diagnosis. Pooling data across age groups and using the Wilcoxon rank-sum test, scores for CDAT ( $P=2.7 \times 10^{-6}$ ), CSI ( $P=1.8 \times 10^{-6}$ ), and CD-QOL ( $P=8.9 \times 10^{-11}$ ) were significantly different between respondents diagnosed less than five years ago and respondents diagnosed at least five years ago.



Table S1

|                  | CDAT  | CSI   | CSI (no overlap) | CD-QOL |
|------------------|-------|-------|------------------|--------|
| CDAT             | -     | 0.72  | 0.66             | -0.54  |
| CSI              | 0.72  | -     | 0.99             | -0.64  |
| CSI (no overlap) | 0.66  | 0.99  | -                | -0.63  |
| CD-QOL           | -0.54 | -0.64 | -0.63            | -      |

Spearman correlation between scores of instruments. “CSI (no overlap)” refers to the set of questions in CSI minus the two questions that are also in CDAT. A higher CD-QOL corresponds to better quality of life, whereas higher CDAT and CSI scores correspond to worse dietary adherence and disease-specific symptoms, respectively.
